# Supplementary material for: Investigation of soot precursor molecules during inception by acetylene pyrolysis using reactive molecular dynamics
Source: Copernicus journal article supplement (doi:10.5194/ar-2024-34), 2024-11-26
Supplement: Supplementary file [file ar-2024-34-AC1-supplement.pdf]

**Response ar-2024-34: “Investigation of soot precursor molecules during inception by acetylene pyrolysis using reactive molecular dynamics”** by Ganguly et al. The Editor’s and Reviewers’ comments are shown in *italics*. The responses (blue) and changes in the revised manuscript (red), are given below. Corrections made on this new revision were highlighted in red.

## Reviewer 1

*The current work reports on ReaxFF simulations of acetylene from 1350-1800 K for large systems (1000 molecules) for long time spans (10 ns). The work reports statistics of molecules formed over time with emphasis on the formation of incipient soot, i.e. molecule growing to large species with a molecular weight over roughly 200 up to about 1000 in this work. The analysis of the ReaxFF simulations is quite detailed and some kinds of molecules are found that have not yet been reported in similar studies at different conditions (e.g. species with small rings and long aliphatic chains). There is some comparison to and new insight compared to previous ReaxFF simulations of soot formation.*

*A1. However, there is little comparison to experiments results (some are mentioned and some disagreement is found, but not discussed in much detail (p. 19))...*

A1. We thank the Reviewer for this Comment. Indeed, comparison of ReaxFF simulations with experiments is challenging due to lack of experimental data in the sub-nm scale. We have provided a comparison of the C/H ratio of the MD-generated soot precursors with previously reported AFM measurements in Fig. S19 of the original manuscript.

To address the Reviewer’s Comment, we have added the following discussion in p. 14, lines 8-23 of the revised manuscript: “The C/H ratio of the MD-obtained non-cyclic (Fig. S19: diamonds) and cyclic soot precursors (Fig. S19: circles) consisting of 11-70 C atoms formed throughout the nucleation and surface growth stages ( $t = 0-10$  ns) is compared to that of soot precursors obtained during ethylene combustion by high-resolution atomic force microscopy (AFM) measurements (Commodo et al. 2019, Lieske et al. 2023) (Fig. S19: filled symbols) at 1350 – 1800 K. Most of the soot precursor molecules composed of up to 25 C atoms exhibit a C/H ratio in the range of 1-2, consistent with the C/H ratio of the molecules observed by AFM (Commodo et al. 2019, Lieske et al. 2023), which range between 1 to 2.5. Larger MD-obtained clusters attain a C/H ratio of 1-1.5, contrary to experiments revealing higher C/H ratios of  $\sim 2$ . This can be attributed to the larger fraction of aromatic rings observed in the soot clusters sampled from premixed ethylene ( $C_2H_4$ )/air flames (Commodo et al. 2019, Schulz et al. 2019), along with the fact that side-aliphatic chains had been excluded from the calculation of the C/H ratio of these AFM-obtained soot clusters (Commodo et al. 2019). This difference between AFM measurements (Commodo et al. 2019, Lieske et al. 2023) and MD simulations could also arise from the presence of  $O_2$  in experiments that might have led to the formation of different soot precursors than those obtained here by pyrolysis alone. Aliphatic moieties, however, have been observed both in AFM mainly in the form of methyl groups or larger alkyl chains (Schulz et al. 2019). Additionally, the characteristics of soot nanoparticles obtained at the end of these simulations have been rigorously validated in Mukut et al. (Mukut et al. 2024), further confirming the validity of the present simulations.”.

*A2a. ...and none to soot modelling based on kinetic mechanisms / models, though many exist for acetylene pyrolysis ("acetylene soot formation models" in google scholar yields many results with promising titles for work on and with such models). I think such a comparison would strengthen the work considerably,...*

A2a. We thank the Reviewer for raising this question. Even though many reaction kinetics mechanisms exist in the literature for soot formation by acetylene, they primarily rely on dimerization reactions and PAH formation with subsequent physical dimerization of PAHs that leads to soot formation. These kinetic models provide an Arrhenius approximation for some reaction pathways and rely on some fundamental calculations and a lot of experimental observations.

In the present simulations, most of the investigated soot precursor molecules are composed of cyclic structures decorated with aliphatic branches (e.g., Tables 1-5), in contrast to existing kinetic models which capitalize on formation of peri-condensed PAHs. It should be noted, however, that even though not present at all timesteps, aromatic species formation is observed. For example, in one of the acetylene pyrolysis simulations at 1500 K, a benzene ring formation is observed at 7.55 ns, as demonstrated in Figure S15b (bottom) and Figure R1 below:

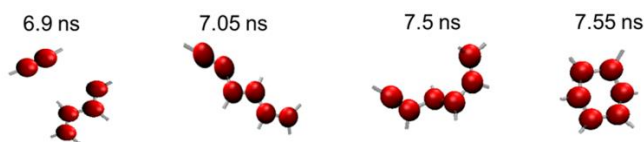

**Figure R1.** Snapshots of molecules leading to formation of a benzene molecule at 1500 K.

This is consistent with kinetic models suggesting that benzene, a major product of acetylene pyrolysis, is formed by addition of  $C_2H_2$  on vinylacetylene, as discussed in reaction R12 of Saggese et al. (Saggese et al. 2014).

To further address the Reviewer's Comment, the following discussion has been added in p. 18 lines 9-11 of the revised manuscript: "The present ReaxFF simulations can capture the formation of benzene, a major intermediate of soot formation (Fig. S15b, bottom), consistent with reaction mechanisms of acetylene pyrolysis (Saggese et al. 2014)".

A2b. ...together with a quantum mechanical validation of new pathways or at least a note of caution that the results pertain to the ReaxFF model used, and not necessarily to reality.

A2b. The scope of our work focuses on the characterization of possible soot precursor molecules rather than exploring possible reaction pathways. For the latter, a more detailed and automated comparison of the ReaxFF-based reaction network to kinetic models would be required with reaction path identification analysis. To the best of our knowledge, such analysis has been made possible only for short simulation times as it is computationally extremely demanding since it requires recording geometry and atomic connectivity data every 1 fs (Schmalz et al. 2024), to capture C-H bond vibrations. In the present simulations this information is recorded every 0.25 ns, as mentioned in the first sentence of Section 2.2: "The chemical structure of all species consisting of up to 87 C atoms formed during pyrolysis and their number concentration is obtained as a function of time and is recorded every 0.25 ns." rendering reaction pathway identification impossible.

It should also be noted that reactive MD simulations provide detailed elementary reactions, while kinetic reaction mechanisms are typically based on lumped steps of elementary reactions. As such, the present ReaxFF simulations can serve as a tool to propose new possible additions in literature chemical reaction pathways. This has been demonstrated by Schmalz et al. (Schmalz et al. 2024) for n-heptane and iso-octane pyrolysis by ReaxFF, revealing that >90% of ReaxFF-obtained reactions were not considered in kinetic models (Langer, Mao and Pitsch 2023).

To clarify this, the following discussion has been added in the 3<sup>rd</sup> paragraph of the Introduction of the revised manuscript: "...based on ReaxFF force field (Castro-Marcano et al. 2012) provide insight into the reaction kinetics (Schmalz et al. 2024) and dynamic formation of soot (Goudeli 2019). Schmalz et al. (Schmalz et al. 2024) identified the reaction pathways to the formation of benzene, predicted by ReaxFF pyrolysis of n-heptane and iso-octane, revealing that >90% of ReaxFF-obtained reactions were not considered in kinetic models (Langer et al. 2023). Such reaction path identification analysis, however, has been limited only to short simulation times and 100 fuel molecules, as even such small pyrolysis systems yield a complex network of more than 10,000 reactions. ReaxFF simulations have been used more commonly to investigate soot inception (Mao, van Duin and Luo 2017, Yuan et al. 2019, Han et al. 2017) and growth (Yuan et al. 2019) using PAHs as the starting nucleating species. These simulations..."

As pointed out by the Reviewer and as discussed in Schmalz et al. (Schmalz et al. 2024), a system-specific verification of the ReaxFF-derived reactions by *ab initio* quantum mechanics calculations, such as density functional theory, is necessary. To address this, the following sentence was added in the end of the Conclusions of the revised manuscript: "However, verification of ReaxFF-derived reactions with *ab initio* quantum mechanics calculations, such as density functional theory is essential to ensure the importance of these reactions in soot formation kinetics."

*Specific comments:*

1. P 5: Please make the scripts used for analysis of the MD data available or add more information on the algorithms used.

1. Post-analysis of the MD data was carried out using the open-source Chemical Trajectory Analyzer (ChemTraYzer) analysis tool (Döntgen et al. 2018) tailored for post-processing reactive Molecular Dynamics. ChemTraYzer utilizes bond order information and atom trajectories generated by ReaxFF simulations. The individual molecules emerging at each timestep are distinguished based on the atom connectivity data available in the bond order files generated by ReaxFF simulations, and their detailed chemical structure is visualized

based on the ReaxFF-obtained bond order information based on their interatomic distances (Chenoweth, van Duin and Goddard 2008). In ChemTraYzer, the bond orders are rounded to increments of 0.5 (i.e., 0.5, 1, 1.5, etc.) with those below 0.5 being disregarded (Krep et al. 2022). If an atom's total rounded bond orders exceed its valency, no further bonds are assigned. The accepted bonds are then processed through Open Babel (O'Boyle et al. 2011) to obtain the simplified molecular-input line-entry system (SMILES) code.

To clarify this, we have modified Section 2.2 of the revised manuscript as follows: “The chemical structure of all species consisting of up to 87 C atoms formed during pyrolysis and their number concentration is obtained as a function of time and is recorded every 0.25 ns. The detailed structure of each individual molecule is visualized using the **Chemical Trajectory Analyzer (ChemTraYzer) analysis tool** (Döntgen et al. 2018, Döntgen et al. 2015), which utilizes the bond order information and the **atom coordinates generated by ReaxFF simulations**. The individual molecules emerging at each timestep are distinguished based on the **atom connectivity data available in the bond order files generated by ReaxFF simulations**, and their detailed chemical structure is visualized based on the ReaxFF-obtained bond order information and their interatomic distances (Chenoweth et al. 2008). In ChemTraYzer, the bond orders are rounded to increments of 0.5 (i.e., 0.5, 1, 1.5, etc.) with those below 0.5 being disregarded, as discussed in Krep et al. (Krep et al. 2022). The bond information is converted to simplified molecular-input line-entry system (SMILES) codes through Open Babel (O'Boyle et al. 2011) representing the detailed chemical structures of each of the molecules, which are visualized with MolView (Bergwerf 2015). The snapshots of the **entire simulated system** were visualized using VMD (Humphrey, Dalke and Schulten 1996).”.

In addition, the algorithm for ring analysis is discussed in a new Section 2.3 in the revised manuscript: **“2.3 Analysis of cyclic structures**

The total number of 3-, 5-, and 6-member rings formed in the system is quantified at different timesteps during the pyrolysis simulations. A connectivity matrix is constructed utilizing the coordinates and bond order of all atoms and their neighbors. When 3, 5, or 6 atoms are connected in series in a closed loop they correspond to 3-, 5- and 6-member rings, respectively, and are distinguished from non-cyclic structures.

Once the cyclic structures have been identified, the bonds of each of their constituent pairs are categorized as single C-C bonds if the bond order is  $< 1.33$  (Emri and Lente 2004), double C-C bonds if the bond order values range between 1.33-2.85 (Emri and Lente 2004, Hermann and Frenking 2016), and triple C-C bonds if the bond order is at least 2.86, corresponding to the triple C-C bond in  $C_2H_2$  (Hermann and Frenking 2016). A bond order greater or equal to 1.33 (graphite) (Emri and Lente 2004) indicates the presence of a double bond for aromatic compounds and bond order of  $\sim 1.92$  (ethylene) indicates double bonds in aliphatic compounds (Hermann and Frenking 2016). The aromaticity of each of the ring structures is assessed by counting the electrons in p orbitals that are involved in double bonds or lone pairs and applying Hückel's rule (Solà 2022). Due to shared electron distribution and fractional bonds predicted by ReaxFF, along with the assignment of bond orders in increments of 0.5 by ChemTraYzer, some molecules might be visualized as having C atoms with more than four bonds, which have been excluded from the reported results.”.

2. P 8: “Incipient soot is defined by the formation ...” providing this definition earlier (before talking about incipient soot) may make it easier to follow the introduction.

2. We thank the Reviewer for this suggestion. In the revised manuscript, we moved the definition of incipient soot in the 1<sup>st</sup> paragraph of Section 2.1: “...used in this study. Here, incipient soot is referred to soot clusters with  $M_w \geq 202$  g/mol (Mukut et al. 2023), corresponding to the molecular weight of pyrene (Dillstrom and Violi 2017), which is one of the most commonly considered seed molecules that initiate soot inception (Frenklach 2002, Mukut et al. 2023). Bond breakage and new...” and we rephrased the corresponding clause in p. 8 of the “Results and Discussion” Section: “...hydrocarbon molecules. The formation of incipient soot, defined as soot clusters with molecular weight equal to or greater than that of pyrene (Dillstrom and Violi 2017), is denoted by the horizontal line in Fig. 2, corresponding to  $M_w = 202$  g/mol. The onset of surface growth...”.

3. P 10: “The faster consumption rate of the C6-C10 molecules could be attributed to their larger projected area compared to C1-C5 compounds, rendering them more likely to be scavenged by the large incipient soot.” (And a similar statement in the following paragraph) This seems very speculative to me. Considering the much higher number of C1-5 molecules and the moderate size difference, I would expect the opposite (more collisions). Please check by e. g. calculating collision frequencies with a simple kinetic gas theory model if this is the correct reason.

3. The collision frequency based on the kinetic theory of gases can be estimated by:

$$\beta = \pi (d_1 + d_2)^2 \sqrt{\frac{k_B T}{2\pi} \left( \frac{1}{m_1} + \frac{1}{m_2} \right)} \quad (\text{R1})$$

where  $k_B$  is the Boltzmann constant,  $T$  is the temperature, and  $d_1$  &  $d_2$  are the diameters of colliding species 1 & 2, corresponding to masses  $m_1$  &  $m_2$ .

To compare the consumption rates of  $C_{1-5}$  and  $C_{6-10}$  molecules, we calculated the collision frequencies of acetylene ( $C_2H_2$ ), with kinetic diameter of 0.33 nm and a molecular mass of 26.038 g/mol, and naphthalene ( $C_{10}H_8$ ) with kinetic diameter of 0.62 nm and a molecular mass of 128.17 g/mol. Equation R1 yields  $\beta_{acetylene} = 3.58 \cdot 10^{-16} \text{ m}^3/\text{s}$  and  $\beta_{naphthalene} = 5.7 \cdot 10^{-16} \text{ m}^3/\text{s}$  for acetylene and naphthalene, respectively. This result indicates that the largest molecules are indeed consumed faster than smaller ones, assuming that every collision is reactive leading to successful clustering.

To further support this statement, we have added the following sentence in the end of the first paragraph of p. 11 of the revised manuscript: "...more likely to be scavenged by the large incipient soot. For example, the collision frequency function of a naphthalene molecule is approximately 1.6 times smaller than that of an acetylene molecule, based on the kinetic theory of gases."

The consumption rates of  $C_{1-5}$  and  $C_{6-10}$  molecules are also obtained by the present ReaxFF simulations, using the number concentration of these classes of molecules at 1350 K within the timeframe of 5.2 (corresponding to the onset of surface growth) to 6.5 ns in Figure 3. In practice, not all molecules are equally reactive, so a collision efficiency,  $\alpha$ , can be introduced in the equation of the rate of change of the number concentration of the reacting species:

$$\frac{dN}{dt} = -\frac{1}{2} \alpha \beta N^2 \quad (\text{R2})$$

Solving for the differential equation R2, assuming a constant collision rate,  $\beta$ , yields:

$$\alpha = \frac{2 \left( \frac{1}{N(t_2)} - \frac{1}{N(t_1)} \right)}{\beta \Delta t} \quad (\text{R3})$$

Equation R3 can be used to provide an estimate of the collision efficiency of  $C_{1-5}$  and  $C_{6-10}$  species. When applied within the timeframe  $\Delta t = 6.5 - 5.2 = 1.3 \text{ ns}$ , it gives:

$$\alpha = \frac{2 \left( \frac{1}{318} - \frac{1}{433} \right) \frac{(75.6 \cdot 10^{-10})^3 \text{ m}^3}{\text{particles}}}{3.58 \cdot 10^{-16} \text{ m}^3/\text{s} \cdot 1.3 \cdot 10^{-9} \text{ s}} = 0.00155 \text{ for } C_{1-5} \quad (\text{R4})$$

and

$$\alpha = \frac{2 \left( \frac{1}{14} - \frac{1}{40} \right) \frac{(75.6 \cdot 10^{-10})^3 \text{ m}^3}{\text{particles}}}{5.7 \cdot 10^{-16} \text{ m}^3/\text{s} \cdot 1.3 \cdot 10^{-9} \text{ s}} = 0.054 \text{ for } C_{6-10} \text{ species} \quad (\text{R5})$$

These estimated collisions efficiencies indicate that successful reactive collisions are more probable for larger species, also contributing to their faster consumption, even though accurate determination of the collision efficiency would require a trajectory calculation-collision rate theory method approach, similar to that employed in Yang et al. (Yang, Goudeli and Hogan 2018) and Goudeli et al. (Goudeli, Lee and Hogan 2020), to account for reactivity and chemical stability of individual reactive species. The trend observed in the collision efficiencies of equations R4 and R5 is consistent with collision efficiency measurements (Raj et al. 2010) and simulations of PAH dimerization (Totton, Misquitta and Kraft 2012) even though growth by chemical reactions had not been considered in the literature.

To address this Comment, the following sentence was added in the first paragraph of p. 11 of the revised manuscript: "It should be noted, however, that the reactivity and chemical stability of each species vary depending on their size and chemical nature, which also affects their consumption rate."

4. P 17: “cyclopropyne (Saxe and Schaefer 1980)” Is this molecule real or a ReaxFF artefact? According to Saxe and Schefer, the singlet state is unstable and the triplet state is metastable at a quite high energy. <https://en.wikipedia.org/wiki/Cycloalkyne> says: “There is little experimental evidence supporting the existence of cyclobutyne (C<sub>4</sub>H<sub>4</sub>) or cyclopropyne (C<sub>3</sub>H<sub>2</sub>), aside from studies reporting the isolation of an osmium complex with cyclobutyne ligands.[4]”. A few lines later “... indicating they are relatively stable in nature.” Is that a valid conclusion? I would say the results indicate that they (cyclopropyne molecules) are stable at the ReaxFF level, but not necessarily in nature.

4. The Reviewer is correct as cyclopropyne is inherently unstable, and may exist only transiently in high-energy states, making its experimental isolation challenging (Zanda et al. 2020). On the other hand, ReaxFF does not model different spin states. It only provides an approximation of the potential energy surface based on the parametrization and may not accurately predict or describe behaviors specific to higher energy or alternative spin states like the triplet state of cyclopropyne. For this, quantum mechanical methods, such as DFT might be needed to more accurately describe the stability of reactive intermediates.

To address this, we have rephrased the relevant discussion in the first paragraph of Section 3.2 as follows: “Some of these 3-member rings reported in Table 3 correspond to known monocyclic molecules, including methylene cyclopropane (Zádor, Fellows and Miller 2017) (molecule A), cyclopropyne (Saxe and Schaefer 1980) (molecule B), and cyclopropane (Li, Zhang and Shi 2020) (molecule C), and bicyclic molecules, including bicyclo[1.1.0]butane (Fawcett 2020) (molecule D), spiropentadiene (Billups and Haley 1991) (molecule E) and cyclopropylidencyclopropane (Güney et al. 2013) (molecule F). **It should be noted that some of the 3-member ring structures predicted by ReaxFF, such as cyclopropyne, are not inherently stable and may exist only transiently in high energy states.** C<sub>2</sub>H cyclic molecules (highlighted in pink) having three-center two-electron configuration (Lammertsma and Ohwada 1996) are observed at all six timesteps ~~indicating they are relatively stable in nature.~~”

5. P 22: “... allowing for a broader and more accurate exploration of the pathways” I agree to “broader”, but I am sceptical regarding “more accurate” without QM or exp validation, see my previous comments.

5. We agree with the Reviewer and we have rephrased the Conclusions as follows: “These simulations do not assume any specific soot precursors, allowing for a broader exploration of the pathways involved in soot nucleation.”.

6. P 23: “Tracking the pathway of formation of these species could reveal new detailed chemical routes that occur during soot nucleation, which might have not been extensively considered in existing kinetic models, thereby expanding the current understanding of soot formation pathways.” I think this would be really useful. Can this be added to the current work or at least the simulation (raw) data provided that are needed for such an analysis?

6. We agree with the Reviewer. However, as discussed in response to Comment A2, such an analysis requires very frequent recording of both geometry and atomic connectivity data, 250,000 times more frequent than the timeframes used here.

#### **Technical corrections:**

P 3: “that shoot growth”  
Corrected.

#### **References**

- Bergwerf, H. (2015) MolView: an attempt to get the cloud into chemistry classrooms. *DivCHED CCCE: Committee on Computers in Chemical Education*, 9, 1-9.
- Billups, W. E. & M. M. Haley (1991) Spiropentadiene. *Journal of the American Chemical Society*, 113, 5084-5085.
- Castro-Marciano, F., A. M. Kamat, M. F. Russo, A. C. T. van Duin & J. P. Mathews (2012) Combustion of an Illinois No. 6 coal char simulated using an atomistic char representation and the ReaxFF reactive force field. *Combustion and Flame*, 159, 1272-1285.
- Chenoweth, K., A. C. T. van Duin & W. A. Goddard (2008) ReaxFF Reactive Force Field for Molecular Dynamics Simulations of Hydrocarbon Oxidation. *The Journal of Physical Chemistry A*, 112, 1040-1053.
- Commodo, M., K. Kaiser, G. De Falco, P. Minutolo, F. Schulz, A. D'Anna & L. Gross (2019) On the early stages of soot formation: Molecular structure elucidation by high-resolution atomic force microscopy. *Combustion and Flame*, 205, 154-164.

- Dillstrom, T. & A. Violi (2017) The effect of reaction mechanisms on the formation of soot precursors in flames. *Combustion Theory and Modelling*, 21, 23-34.
- Döntgen, M., M.-D. Przybylski-Freund, L. C. Kröger, W. A. Kopp, A. E. Ismail & K. Leonhard (2015) Automated Discovery of Reaction Pathways, Rate Constants, and Transition States Using Reactive Molecular Dynamics Simulations. *Journal of Chemical Theory and Computation*, 11, 2517-2524.
- Döntgen, M., F. Schmalz, W. A. Kopp, L. C. Kröger & K. Leonhard (2018) Automated Chemical Kinetic Modeling via Hybrid Reactive Molecular Dynamics and Quantum Chemistry Simulations. *Journal of Chemical Information and Modeling*, 58, 1343-1355.
- Emri, J. & G. Lente (2004) Use of an electron equivalent relationship between bond length and bond order to study chemical bonding. Part II. A study of bond orders, bond lengths and aromaticity in polycyclic aromatic hydrocarbons. *Journal of Molecular Structure: THEOCHEM*, 671, 211-219.
- Fawcett, A. (2020) Recent advances in the chemistry of bicyclo- and 1-azabicyclo[1.1.0]butanes. 92, 751-765.
- Frenklach, M. (2002) Reaction mechanism of soot formation in flames (- 2002). *Physical Chemistry Chemical Physics*, 4, 2028-2037.
- Goudeli, E. (2019) Nanoparticle growth, coalescence, and phase change in the gas-phase by molecular dynamics. *Current Opinion in Chemical Engineering*, 23, 155-163.
- Goudeli, E., J. Lee & C. J. Hogan (2020) Silica nanocluster binding rate coefficients from molecular dynamics trajectory calculations. *Journal of Aerosol Science*, 146, 105558.
- Güney, M., S. Eşsiz, A. Daştan, M. Balci, O. De Lucchi, E. Şahin & F. Fabris (2013) Stereoconvergent Generation of a Contrasteric syn-Bicyclopropylidene (=syn-Cyclopropylidene)cyclopropane by Stille-Like Coupling. *Helvetica Chimica Acta*, 96, 941-950.
- Han, S., X. Li, F. Nie, M. Zheng, X. Liu & L. Guo (2017) Revealing the Initial Chemistry of Soot Nanoparticle Formation by ReaxFF Molecular Dynamics Simulations. *Energy & Fuels*, 31, 8434-8444.
- Hermann, M. & G. Frenking (2016) The Chemical Bond in C<sub>2</sub>. *Chemistry – A European Journal*, 22, 4100-4108.
- Humphrey, W., A. Dalke & K. Schulten (1996) VMD: visual molecular dynamics. *Journal of molecular graphics*, 14, 33-38.
- Krep, L., I. S. Roy, W. Kopp, F. Schmalz, C. Huang & K. Leonhard (2022) Efficient Reaction Space Exploration with ChemTraYzer-TAD. *Journal of Chemical Information and Modeling*, 62, 890-902.
- Langer, R., Q. Mao & H. Pitsch (2023) A detailed kinetic model for aromatics formation from small hydrocarbon and gasoline surrogate fuel combustion. *Combustion and Flame*, 258, 112574.
- Li, P., X. Zhang & M. Shi (2020) Recent developments in cyclopropene chemistry. *Chemical Communications*, 56, 5457-5471.
- Lieske, L.-A., M. Commodo, J. W. Martin, K. Kaiser, V. Benekou, P. Minutolo, A. D'Anna & L. Gross (2023) Portraits of Soot Molecules Reveal Pathways to Large Aromatics, Five-/Seven-Membered Rings, and Inception through  $\pi$ -Radical Localization. *ACS Nano*.
- Mao, Q., A. C. T. van Duin & K. H. Luo (2017) Formation of incipient soot particles from polycyclic aromatic hydrocarbons: A ReaxFF molecular dynamics study. *Carbon*, 121, 380-388.
- Mukut, K. M., A. Ganguly, E. Goudeli, G. A. Kelesidis & S. P. Roy (2023) Characterization of Nascent Soot Particles from Acetylene Pyrolysis: A Molecular Modeling Perspective. *13th US National Combustion Meeting*.
- (2024) Physical, chemical and morphological evolution of incipient soot obtained from molecular dynamics simulation of acetylene pyrolysis. *Fuel*, 373, 132197.
- O'Boyle, N. M., M. Bank, C. A. James, C. Morley, T. Vandermeersch & G. R. Hutchison (2011) Open Babel: An open chemical toolbox. *Journal of Cheminformatics*, 3, 33.
- Raj, A., M. Sander, V. Janardhanan & M. Kraft (2010) A study on the coagulation of polycyclic aromatic hydrocarbon clusters to determine their collision efficiency. *Combustion and Flame*, 157, 523-534.
- Saggese, C., N. E. Sánchez, A. Frassoldati, A. Cuoci, T. Faravelli, M. U. Alzueta & E. Ranzi (2014) Kinetic Modeling Study of Polycyclic Aromatic Hydrocarbons and Soot Formation in Acetylene Pyrolysis. *Energy & Fuels*, 28, 1489-1501.
- Saxe, P. & H. F. Schaefer, III (1980) Can cyclopropyne really be made? *Journal of the American Chemical Society*, 102, 3239-3240.
- Schmalz, F., W. A. Kopp, E. Goudeli & K. Leonhard (2024) Reaction path identification and validation from molecular dynamics simulations of hydrocarbon pyrolysis. *International Journal of Chemical Kinetics*, n/a.
- Schulz, F., M. Commodo, K. Kaiser, G. De Falco, P. Minutolo, G. Meyer, A. D'Anna & L. Gross (2019) Insights into incipient soot formation by atomic force microscopy. *Proceedings of the Combustion Institute*, 37, 885-892.
- Solà, M. (2022) Aromaticity rules. *Nature Chemistry*, 14, 585-590.
- Totton, T. S., A. J. Misquitta & M. Kraft (2012) A quantitative study of the clustering of polycyclic aromatic hydrocarbons at high temperatures. *Physical Chemistry Chemical Physics*, 14, 4081-4094.
- Yang, H., E. Goudeli & C. J. Hogan, Jr. (2018) Condensation and dissociation rates for gas phase metal clusters from molecular dynamics trajectory calculations. *The Journal of Chemical Physics*, 148, 164304.
- Yuan, H., W. Kong, F. Liu & D. Chen (2019) Study on soot nucleation and growth from PAHs and some reactive species at flame temperatures by ReaxFF molecular dynamics. *Chemical Engineering Science*, 195, 748-757.
- Zádor, J., M. D. Fellows & J. A. Miller (2017) Initiation Reactions in Acetylene Pyrolysis. *The Journal of Physical Chemistry A*, 121, 4203-4217.
- Zanda, M., R. Bucci, N. L. Sloan & L. Topping (2020) Highly Strained Unsaturated Carbocycles. *European Journal of Organic Chemistry*, 2020, 5278-5291.
